# Supplementary material for: Modeling the Immune Response for Pathogenic and Nonpathogenic Orthohantavirus Infections in Human Lung Microvasculature Endothelial Cells
Source: MDPI journal article supplement (doi:10.3390/v15091806), 2023-08-24
Supplement: s1 [file s1]

**Table S1. Results of nonlinear least square fits to the solutions of the system of ODEs by gene and virus.**  
The values in parentheses below each parameter are margins of error corresponding to a 95% confidence interval. The SSE is the sum of squared errors, while t.max and y.max give, respectively, the time at which the peak occurs and its value.

| Gene   | Virus | Parameter Estimates                                   |                                                       |                                                       | Curve Statistics |       |       |
|--------|-------|-------------------------------------------------------|-------------------------------------------------------|-------------------------------------------------------|------------------|-------|-------|
|        |       | $a_{i1}$                                              | $a_{i2}$                                              | $r_i$                                                 | SSE              | t.max | y.max |
| CCL5   | ANDV  | $1.4 \times 10^{-11}$<br>( $\pm 7.4 \times 10^{-3}$ ) | $5.0 \times 10^{-3}$<br>( $\pm 1.1 \times 10^{-2}$ )  | $9.1 \times 10^{-2}$<br>( $\pm 9.2 \times 10^{-2}$ )  | 342.0            | 53.8  | 120.5 |
|        | HTNV  | $9.1 \times 10^{-12}$<br>( $\pm 3.3 \times 10^{-3}$ ) | $2.2 \times 10^{-3}$<br>( $\pm 4.5 \times 10^{-3}$ )  | $9.0 \times 10^{-11}$<br>( $\pm 2.6 \times 10^{-2}$ ) | 219.1            | 72.0  | 168.0 |
|        | PHV   | $1.4 \times 10^{-11}$<br>( $\pm 3.8 \times 10^{-3}$ ) | $1.9 \times 10^{-3}$<br>( $\pm 5.2 \times 10^{-3}$ )  | $2.2 \times 10^{-2}$<br>( $\pm 4.9 \times 10^{-2}$ )  | 220.0            | 64.1  | 90.7  |
| CXCL10 | ANDV  | $3.1 \times 10^{-9}$<br>( $\pm 4.6 \times 10^{-2}$ )  | $5.9 \times 10^{-2}$<br>( $\pm 9.9 \times 10^{-2}$ )  | $3.2 \times 10^{-1}$<br>( $\pm 3.0 \times 10^{-1}$ )  | 574.8            | 40.3  | 603.4 |
|        | HTNV  | $7.4 \times 10^{-3}$<br>( $\pm 1.4 \times 10^{-2}$ )  | $1.6 \times 10^{-3}$<br>( $\pm 1.9 \times 10^{-2}$ )  | $3.3 \times 10^{-2}$<br>( $\pm 4.1 \times 10^{-2}$ )  | 5430.0           | 47.6  | 399.8 |
|        | PHV   | $7.8 \times 10^{-3}$<br>( $\pm 1.3 \times 10^{-2}$ )  | $4.0 \times 10^{-12}$<br>( $\pm 1.8 \times 10^{-2}$ ) | $4.2 \times 10^{-2}$<br>( $\pm 5.4 \times 10^{-2}$ )  | 4090.0           | 45.5  | 319.3 |
| CXCL11 | ANDV  | $3.4 \times 10^{-12}$<br>( $\pm 2.4 \times 10^{-2}$ ) | $1.5 \times 10^{-2}$<br>( $\pm 3.6 \times 10^{-2}$ )  | $9.5 \times 10^{-2}$<br>( $\pm 1.1 \times 10^{-1}$ )  | 6390.0           | 45.2  | 376.4 |
|        | HTNV  | $8.6 \times 10^{-12}$<br>( $\pm 1.7 \times 10^{-2}$ ) | $8.6 \times 10^{-3}$<br>( $\pm 2.2 \times 10^{-2}$ )  | $1.9 \times 10^{-2}$<br>( $\pm 3.6 \times 10^{-2}$ )  | 10100.0          | 55.2  | 454.2 |
|        | PHV   | $2.8 \times 10^{-3}$<br>( $\pm 7.9 \times 10^{-3}$ )  | $5.3 \times 10^{-3}$<br>( $\pm 1.1 \times 10^{-2}$ )  | $2.5 \times 10^{-2}$<br>( $\pm 2.1 \times 10^{-2}$ )  | 2070.0           | 51.9  | 398.7 |
| IDO1   | ANDV  | $7.7 \times 10^{-13}$<br>( $\pm 5.5 \times 10^{-5}$ ) | $1.2 \times 10^{-3}$<br>( $\pm 7.0 \times 10^{-5}$ )  | $1.1 \times 10^{-3}$<br>( $\pm 6.3 \times 10^{-4}$ )  | 0.1              | 44.1  | 22.6  |
|        | HTNV  | $7.8 \times 10^{-9}$<br>( $\pm 1.2 \times 10^{-3}$ )  | $6.8 \times 10^{-4}$<br>( $\pm 1.8 \times 10^{-3}$ )  | $8.0 \times 10^{-2}$<br>( $\pm 9.2 \times 10^{-2}$ )  | 21.1             | 46.6  | 19.4  |
|        | PHV   | $2.3 \times 10^{-12}$<br>( $\pm 5.2 \times 10^{-4}$ ) | $4.0 \times 10^{-4}$<br>( $\pm 7.4 \times 10^{-4}$ )  | $7.2 \times 10^{-2}$<br>( $\pm 5.9 \times 10^{-2}$ )  | 4.4              | 46.6  | 12.2  |
| IFNB1  | ANDV  | $3.7 \times 10^{-13}$<br>( $\pm 1.6 \times 10^{-2}$ ) | $6.4 \times 10^{-3}$<br>( $\pm 2.9 \times 10^{-2}$ )  | $2.0 \times 10^{-1}$<br>( $\pm 4.6 \times 10^{-1}$ )  | 336.3            | 41.9  | 95.7  |
|        | HTNV  | $4.3 \times 10^{-5}$<br>( $\pm 7.8 \times 10^{-4}$ )  | $6.6 \times 10^{-4}$<br>( $\pm 1.0 \times 10^{-3}$ )  | $3.0 \times 10^{-2}$<br>( $\pm 2.5 \times 10^{-2}$ )  | 18.7             | 51.9  | 32.1  |
|        | PHV   | $6.6 \times 10^{-4}$<br>( $\pm 9.0 \times 10^{-4}$ )  | $3.1 \times 10^{-4}$<br>( $\pm 1.2 \times 10^{-3}$ )  | $2.7 \times 10^{-2}$<br>( $\pm 2.1 \times 10^{-2}$ )  | 26.1             | 49.8  | 46.3  |

**Table S2. Fold change (log<sub>2</sub>) of each gene at 12, 24, 36, 48, 60, and 72 hpi following infection by ANDV, HTNV and PHV.**

|         | ANDV  |       |       |       |       |       | HTNV  |       |       |       |       |       | PHV   |       |       |       |       |       |
|---------|-------|-------|-------|-------|-------|-------|-------|-------|-------|-------|-------|-------|-------|-------|-------|-------|-------|-------|
|         | 12    | 24    | 36    | 48    | 60    | 72    | 12    | 24    | 36    | 48    | 60    | 72    | 12    | 24    | 36    | 48    | 60    | 72    |
| ARG1    | 0.00  | 0.00  | 0.00  | 0.00  | 0.00  | 0.00  | 0.00  | 0.00  | 0.00  | 0.00  | 0.00  | 0.00  | 0.00  | 0.00  | 0.00  | 0.00  | 0.00  | 0.00  |
| CASP3   | 0.41  | 0.04  | 0.55  | 0.59  | 0.51  | 1.08  | 0.14  | 0.01  | 0.03  | 0.34  | 0.55  | 1.19  | -0.22 | 0.14  | 0.22  | 0.69  | 0.76  | 1.19  |
| CASP7   | 0.20  | 0.03  | 0.23  | 0.25  | 0.24  | 0.15  | 0.23  | 0.02  | 0.16  | 0.25  | 0.24  | 0.16  | 0.18  | 0.24  | 0.39  | 0.46  | 0.57  | 0.49  |
| CASP8   | 0.36  | 0.50  | 1.21  | 1.15  | 1.13  | 1.08  | 0.30  | 0.39  | 1.01  | 1.10  | 1.17  | 1.14  | 0.28  | 0.66  | 1.36  | 1.44  | 1.52  | 1.59  |
| CCL2    | 0.28  | 0.16  | 0.33  | 0.52  | 0.43  | 0.31  | 0.27  | 0.22  | 0.29  | 0.43  | 0.61  | 0.33  | 0.25  | 0.19  | 0.64  | 0.70  | 0.83  | 0.81  |
| CCL22   | 0.79  | 0.46  | 0.90  | 0.34  | -0.41 | 0.68  | 0.98  | 0.26  | 0.72  | 0.26  | -0.21 | 0.85  | 0.67  | 0.98  | 0.78  | 1.20  | 1.24  | 1.30  |
| CCL5    | 0.20  | -0.16 | 0.53  | 0.36  | 0.30  | 1.05  | -0.23 | -0.28 | 0.07  | 0.14  | 0.32  | 1.30  | -0.21 | 0.50  | 0.17  | 0.46  | 0.49  | 0.68  |
| CCR7    | 0.19  | 0.91  | 4.30  | 6.89  | 6.68  | 6.23  | -0.06 | 0.76  | 2.98  | 5.80  | 6.65  | 6.37  | 0.24  | 1.09  | 3.41  | 6.24  | 7.18  | 7.45  |
| CD14    | -0.03 | -0.06 | 0.50  | 0.20  | 0.30  | 1.05  | -0.38 | -0.35 | -0.18 | 0.00  | 0.36  | 1.28  | -0.25 | 0.60  | 0.10  | 0.53  | 0.42  | 0.73  |
| CD200R1 | 0.05  | 0.25  | 0.27  | 0.25  | 0.20  | 1.06  | -0.53 | -0.21 | -0.25 | -0.10 | 0.14  | 1.27  | -0.89 | 0.11  | -0.41 | 0.44  | 0.06  | 0.73  |
| CD274   | 0.11  | -0.30 | 0.32  | 0.22  | 0.24  | 0.59  | -0.52 | -0.38 | 0.18  | 0.04  | 0.28  | 0.80  | -1.01 | -0.67 | -0.44 | 0.03  | 0.34  | 0.72  |
| CD80    | -0.04 | 0.67  | 2.41  | 1.92  | 1.33  | 1.42  | -0.05 | 0.81  | 1.81  | 1.54  | 1.55  | 1.59  | -0.09 | 1.06  | 1.93  | 1.91  | 2.18  | 2.19  |
| CD86    | 0.25  | -0.29 | 0.54  | 0.61  | 0.61  | 0.91  | 0.02  | -0.15 | -0.16 | 0.34  | 0.68  | 0.98  | 0.03  | 0.22  | 0.39  | 0.78  | 0.81  | 0.86  |
| CXCL10  | 0.34  | -0.19 | 0.59  | 0.70  | 0.49  | 0.66  | 0.37  | -0.11 | -0.01 | 0.47  | 0.58  | 0.87  | 0.22  | 0.29  | 0.51  | 0.72  | 0.71  | 0.85  |
| CXCL11  | 2.97  | 5.18  | 9.04  | 8.88  | 7.29  | 5.94  | 1.04  | 5.39  | 8.06  | 8.25  | 7.71  | 7.67  | 0.63  | 5.40  | 8.03  | 8.77  | 8.18  | 8.13  |
| IDO1    | 1.84  | 4.32  | 7.67  | 8.73  | 7.66  | 6.71  | 0.69  | 4.52  | 7.70  | 8.69  | 8.44  | 8.35  | 0.08  | 3.90  | 7.39  | 8.92  | 8.57  | 8.73  |
| IFNA1   | 0.35  | 0.95  | 3.93  | 4.66  | 3.32  | 2.11  | 0.04  | 0.43  | 2.95  | 3.84  | 3.07  | 2.72  | 0.09  | 0.95  | 3.48  | 4.53  | 3.53  | 3.16  |
| IFNB1   | 0.08  | -0.16 | 0.43  | 0.56  | 0.58  | 0.96  | -0.04 | -0.11 | 0.12  | 0.37  | 0.55  | 1.14  | -0.09 | 0.44  | 0.40  | 0.76  | 0.79  | 0.93  |
| IFNG    | 0.59  | 1.57  | 6.18  | 6.56  | 4.61  | 3.25  | 0.12  | 2.69  | 4.85  | 5.61  | 5.35  | 5.15  | -0.27 | 2.20  | 4.02  | 5.09  | 4.85  | 4.67  |
| IL10    | 0.14  | -0.21 | 0.25  | 0.39  | 0.63  | 0.92  | -0.05 | -0.33 | -0.10 | 0.19  | 0.33  | 0.83  | -0.21 | 0.06  | 0.20  | 0.52  | 0.83  | 0.80  |
| IL12A   | 0.18  | -0.06 | 0.57  | 0.40  | 0.51  | 1.03  | -0.07 | -0.04 | 0.15  | 0.23  | 0.45  | 1.23  | -0.13 | 0.46  | 0.34  | 0.56  | 0.46  | 0.86  |
| IL15    | 0.43  | -0.01 | 1.27  | 1.69  | 1.19  | 1.30  | 0.14  | -0.07 | 0.87  | 1.30  | 1.25  | 1.36  | -0.18 | 0.03  | 0.85  | 1.61  | 1.53  | 1.67  |
| IL1A    | 0.32  | 0.69  | 1.80  | 1.81  | 1.69  | 1.45  | 0.13  | 0.58  | 1.52  | 1.59  | 1.91  | 1.69  | 0.17  | 0.84  | 1.88  | 1.89  | 1.99  | 1.86  |
| IL1B    | 0.42  | 0.20  | 1.64  | 1.43  | 0.78  | 0.50  | 0.39  | 0.21  | 1.23  | 0.82  | 0.60  | 0.43  | 0.11  | 0.50  | 1.37  | 1.54  | 1.59  | 1.41  |
| IL1RN   | 0.56  | 0.18  | 0.83  | 1.01  | 0.70  | 0.49  | 0.52  | 0.28  | 1.08  | 0.87  | 0.57  | 0.50  | 0.28  | 0.55  | 1.11  | 1.74  | 1.85  | 1.46  |
| IL6     | 0.16  | -0.17 | 0.56  | 0.68  | 0.48  | 1.18  | -0.15 | -0.21 | 0.19  | 0.47  | 0.56  | 1.35  | -0.07 | 0.58  | 0.32  | 0.66  | 0.57  | 0.85  |
| IL8     | 0.59  | 0.38  | 1.25  | 0.98  | 1.00  | 1.21  | 0.49  | 0.40  | 0.62  | 0.58  | 1.00  | 1.19  | 0.25  | 0.48  | 0.84  | 0.93  | 1.24  | 1.57  |
| IRF3    | 0.26  | 0.16  | -0.09 | 0.15  | -0.31 | -0.67 | 0.34  | 0.53  | 0.49  | 0.08  | -0.60 | -0.86 | 0.05  | -0.07 | -0.26 | -0.55 | -0.35 | -1.02 |
| IRF7    | 0.21  | 0.19  | 0.14  | 0.08  | 0.23  | 0.37  | 0.16  | 0.14  | 0.15  | 0.05  | 0.28  | 0.44  | 0.14  | 0.25  | 0.46  | 0.33  | 0.50  | 0.61  |
| ITGAM   | 1.59  | 3.53  | 4.51  | 4.51  | 4.46  | 4.41  | 0.64  | 3.04  | 4.23  | 4.42  | 4.59  | 4.55  | 0.30  | 3.19  | 4.70  | 4.63  | 4.93  | 5.05  |
| NFKB1   | 0.16  | -0.25 | 0.59  | 0.68  | 0.53  | 1.11  | -0.05 | -0.20 | 0.10  | 0.47  | 0.56  | 1.28  | -0.05 | 0.59  | 0.40  | 0.71  | 0.99  | 0.94  |
| NOS2    | 0.14  | -0.06 | 0.02  | -0.02 | 0.08  | 0.35  | 0.16  | -0.09 | -0.07 | -0.02 | 0.08  | 0.45  | 0.12  | 0.29  | 0.26  | 0.32  | 0.29  | 0.47  |
| PPARG   | 0.06  | -0.27 | 0.47  | 0.29  | 0.45  | 1.06  | -0.06 | -0.59 | 0.05  | -0.07 | 0.54  | 1.28  | -0.16 | 0.26  | -0.07 | 0.41  | 0.60  | 0.81  |
| TGFB1   | -0.09 | -0.23 | 0.18  | 0.20  | 0.45  | 0.60  | -0.14 | -0.31 | 0.03  | 0.43  | 0.44  | 0.66  | 0.09  | 0.19  | 0.51  | 0.60  | 0.53  | 0.42  |
| TLR3    | 0.14  | -0.10 | 0.04  | -0.03 | 0.15  | 0.46  | 0.06  | -0.05 | -0.03 | -0.02 | 0.18  | 0.49  | 0.17  | 0.43  | 0.32  | 0.41  | 0.50  | 0.59  |
| TLR4    | 0.12  | 0.06  | 0.32  | 0.37  | 0.48  | 0.43  | 0.11  | 0.02  | 0.21  | 0.41  | 0.51  | 0.44  | 0.04  | 0.22  | 0.62  | 0.56  | 0.75  | 0.73  |
| TLR7    | 0.98  | 2.60  | 4.89  | 5.83  | 5.11  | 4.56  | 0.37  | 2.46  | 4.52  | 5.56  | 5.57  | 5.14  | 0.03  | 2.18  | 4.92  | 5.82  | 5.77  | 5.72  |
| TNF     | 0.09  | 0.13  | 0.29  | 0.21  | 0.44  | 0.65  | 0.10  | 0.07  | 0.03  | 0.12  | 0.43  | 0.68  | 0.00  | 0.40  | 0.56  | 0.48  | 0.61  | 0.89  |
| VEGFA   | 0.12  | -0.26 | 0.47  | 0.54  | 0.55  | 0.97  | -0.07 | -0.17 | 0.12  | 0.51  | 0.62  | 1.16  | -0.04 | 0.46  | 0.32  | 0.71  | 0.75  | 0.93  |

**Table S3. Levels of secreted cytokines, chemokines, and interferon proteins by HLMVECs from four donors at 48 and 60 hpi following infection by ANDV, HTNV and PHV (log<sub>2</sub> pg/ml)**

| hpi | Protein      | Virus | 2559(M) | 2572(M) | 2551(F) | 438Z013.1(F) |
|-----|--------------|-------|---------|---------|---------|--------------|
| 48  | CCL5         | ANDV  | 10.6    | 11.3    | 11.3    | 11.3         |
|     |              | HTNV  | 10.0    | 11.3    | 11.3    | 10.6         |
|     |              | PHV   | 10.0    | 9.6     | 10.6    | 8.0          |
|     | IFN- $\beta$ | ANDV  | 10.6    | 10.3    | 12.0    | 11.0         |
|     |              | HTNV  | 10.3    | 9.6     | 11.3    | 9.6          |
|     |              | PHV   | 10.6    | 9.3     | 11.0    | 9.6          |
|     | IDO          | ANDV  | 8.6     | 8.3     | 10.0    | 10.3         |
|     |              | HTNV  | 9.0     | 7.6     | 8.0     | 9.3          |
|     |              | PHV   | 9.6     | 7.3     | 9.3     | 9.6          |
|     | CXCL10       | ANDV  | 12.3    | 12.6    | 13.0    | 13.3         |
|     |              | HTNV  | 12.3    | 12.6    | 13.6    | 13.0         |
|     |              | PHV   | 12.3    | 12.0    | 13.3    | 12.6         |
|     | CXCL11       | ANDV  | 13.6    | 13.3    | 13.6    | 13.6         |
|     |              | HTNV  | 13.3    | 12.6    | 13.0    | 12.6         |
|     |              | PHV   | 13.3    | 11.6    | 12.6    | 12.3         |
| 60  | CCL5         | ANDV  | 9.3     | 10.0    | 10.3    | 10.3         |
|     |              | HTNV  | 9.0     | 9.6     | 10.3    | 10.3         |
|     |              | PHV   | 8.3     | 9.3     | 10.3    | 9.6          |
|     | IFN- $\beta$ | ANDV  | 7.3     | 7.3     | 10.3    | 8.6          |
|     |              | HTNV  | 7.6     | 7.0     | 9.0     | 8.6          |
|     |              | PHV   | 7.6     | 7.3     | 8.6     | 7.6          |
|     | IDO          | ANDV  | 8.6     | 7.3     | 10.3    | 9.6          |
|     |              | HTNV  | 8.6     | 6.6     | 7.6     | 9.3          |
|     |              | PHV   | 9.0     | 7.3     | 9.3     | 9.6          |
|     | CXCL10       | ANDV  | 12.0    | 12.3    | 13.3    | 13.0         |
|     |              | HTNV  | 11.6    | 12.0    | 13.3    | 13.0         |
|     |              | PHV   | 11.3    | 11.6    | 13.0    | 13.0         |
|     | CXCL11       | ANDV  | 12.6    | 12.3    | 13.0    | 12.6         |
|     |              | HTNV  | 12.3    | 11.3    | 12.6    | 12.3         |
|     |              | PHV   | 11.6    | 11.6    | 12.0    | 12.0         |

**Table S4. Analysis of variance of protein levels of CCL5, CXCL10, CXCL11, IDO, and IFN- $\beta$  secreted by each of the four HLMVEC donors following infection by ANDV, HTNV, or PHV.**

| <b>Protein</b> | <b>Variables</b> | <b>Df</b> | <b>Sum Sq</b> | <b>Mean Sq</b> | <b>F value</b> |
|----------------|------------------|-----------|---------------|----------------|----------------|
| CCL5           | Donor            | 3         | 21.3565279    | 7.1188426      | 11.4774868     |
|                | Virus            | 3         | 274.8916451   | 91.6305484     | 147.7330610    |
|                | Time point       | 1         | 21.3121337    | 21.3121337     | 34.3608852     |
|                | Replicate        | 2         | 1.7215510     | 0.8607755      | 1.3878014      |
|                | Residuals        | 84        | 52.1004981    | 0.6202440      | NA             |
| CXCL10         | Donor            | 3         | 11.9307019    | 3.9769006      | 23.4688767     |
|                | Virus            | 3         | 565.8870005   | 188.6290002    | 1113.1559884   |
|                | Time point       | 1         | 0.3694529     | 0.3694529      | 2.1802516      |
|                | Replicate        | 2         | 0.0043903     | 0.0021952      | 0.0129544      |
|                | Residuals        | 85        | 14.4036103    | 0.1694542      | NA             |
| CXCL11         | Donor            | 3         | 3.0108438     | 1.0036146      | 4.2374724      |
|                | Virus            | 3         | 524.8150407   | 174.9383469    | 738.6265808    |
|                | Time point       | 1         | 10.0610987    | 10.0610987     | 42.4800796     |
|                | Replicate        | 2         | 0.4437120     | 0.2218560      | 0.9367229      |
|                | Residuals        | 85        | 20.1316333    | 0.2368427      | NA             |
| IDO            | Donor            | 3         | 17.7557884    | 5.9185961      | 31.8285961     |
|                | Virus            | 3         | 95.4190841    | 31.8063614     | 171.0459382    |
|                | Time point       | 1         | 1.1035385     | 1.1035385      | 5.9345293      |
|                | Replicate        | 2         | 0.0530458     | 0.0265229      | 0.1426329      |
|                | Residuals        | 85        | 15.8059335    | 0.1859522      | NA             |
| IFNB           | Donor            | 3         | 14.0587286    | 4.6862429      | 32.6835094     |
|                | Virus            | 3         | 85.4521739    | 28.4840580     | 198.6578593    |
|                | Time point       | 1         | 56.6098194    | 56.6098194     | 394.8168319    |
|                | Replicate        | 2         | 0.5240646     | 0.2620323      | 1.8275054      |
|                | Residuals        | 82        | 11.7573640    | 0.1433825      | NA             |

**Table S5. Least mean estimate of log transformed protein levels of CCL5, CXCL10, CXCL11, IDO, and IFN- $\beta$  secreted by each of the four HLMVEC donors following infection by ANDV, HTNV, or PHV.**

| Protein     | Variable | Level     | lsmean   | SE        | df | lower.CL | upper.CL |
|-------------|----------|-----------|----------|-----------|----|----------|----------|
| CCL5        | Donor    | 2551      | 6.422330 | 0.1607591 | 84 | 6.013129 | 6.831531 |
|             |          | 2559      | 5.184890 | 0.1644597 | 84 | 4.766270 | 5.603510 |
|             |          | 2572      | 6.137328 | 0.1607591 | 84 | 5.728127 | 6.546529 |
|             |          | 438Z013.1 | 6.178971 | 0.1644597 | 84 | 5.760351 | 6.597591 |
|             | Virus    | ANDV      | 7.259582 | 0.1607591 | 84 | 6.850382 | 7.668783 |
|             |          | HTNV      | 7.066870 | 0.1683284 | 84 | 6.638402 | 7.495337 |
|             |          | PHV       | 6.506689 | 0.1607591 | 84 | 6.097489 | 6.915890 |
|             |          | Mock      | 3.090378 | 0.1607591 | 84 | 2.681177 | 3.499578 |
| CXCL10      | Donor    | 2551      | 7.646238 | 0.0840273 | 85 | 7.432407 | 7.860068 |
|             |          | 2559      | 6.835044 | 0.0859593 | 85 | 6.616297 | 7.053791 |
|             |          | 2572      | 7.131766 | 0.0840273 | 85 | 6.917936 | 7.345597 |
|             |          | 438Z013.1 | 7.586329 | 0.0840273 | 85 | 7.372499 | 7.800160 |
|             | Virus    | ANDV      | 8.794326 | 0.0840273 | 85 | 8.580496 | 9.008157 |
|             |          | HTNV      | 8.808009 | 0.0859593 | 85 | 8.589262 | 9.026756 |
|             |          | PHV       | 8.505416 | 0.0840273 | 85 | 8.291586 | 8.719247 |
|             |          | Mock      | 3.091626 | 0.0840273 | 85 | 2.877795 | 3.305456 |
| CXCL11      | Donor    | 2551      | 7.516668 | 0.0993401 | 85 | 7.263870 | 7.769466 |
|             |          | 2559      | 7.434438 | 0.1016264 | 85 | 7.175821 | 7.693054 |
|             |          | 2572      | 7.036365 | 0.0993401 | 85 | 6.783567 | 7.289163 |
|             |          | 438Z013.1 | 7.307701 | 0.0994277 | 85 | 7.054680 | 7.560722 |
|             | Virus    | ANDV      | 9.018513 | 0.0993401 | 85 | 8.765715 | 9.271311 |
|             |          | HTNV      | 8.640144 | 0.1016264 | 85 | 8.381528 | 8.898760 |
|             |          | PHV       | 8.321798 | 0.0993401 | 85 | 8.069000 | 8.574595 |
|             |          | Mock      | 3.314717 | 0.0994277 | 85 | 3.061696 | 3.567738 |
| IDO         | Donor    | 2551      | 5.683056 | 0.0880228 | 85 | 5.459058 | 5.907054 |
|             |          | 2559      | 5.543995 | 0.0900465 | 85 | 5.314847 | 5.773143 |
|             |          | 2572      | 4.798292 | 0.0880228 | 85 | 4.574294 | 5.022290 |
|             |          | 438Z013.1 | 5.960967 | 0.0880228 | 85 | 5.736969 | 6.184965 |
|             | Virus    | ANDV      | 6.315423 | 0.0880228 | 85 | 6.091424 | 6.539420 |
|             |          | HTNV      | 5.724507 | 0.0900465 | 85 | 5.495359 | 5.953655 |
|             |          | PHV       | 6.136171 | 0.0880228 | 85 | 5.912173 | 6.360169 |
|             |          | Mock      | 3.810211 | 0.0880228 | 85 | 3.586213 | 4.034209 |
| IFN $\beta$ | Donor    | 2551      | 6.431325 | 0.0790894 | 82 | 6.229902 | 6.632749 |
|             |          | 2559      | 5.649687 | 0.0790713 | 82 | 5.448309 | 5.851064 |
|             |          | 2572      | 5.407521 | 0.0790894 | 82 | 5.206098 | 5.608945 |
|             |          | 438Z013.1 | 5.755120 | 0.0790894 | 82 | 5.553697 | 5.956544 |
|             | Virus    | ANDV      | 6.723792 | 0.0772934 | 82 | 6.526942 | 6.920642 |
|             |          | HTNV      | 6.273919 | 0.0790713 | 82 | 6.072541 | 6.475297 |
|             |          | PHV       | 6.186195 | 0.0772934 | 82 | 5.989345 | 6.383045 |
|             |          | Mock      | 4.059748 | 0.0833278 | 82 | 3.847530 | 4.271966 |

**Table S6. Pairwise comparison of protein secretion levels induced by each virus following infection of each HLMVEC donor.**

| Protein | Variable | contrast         | estimate   | SE        | df | t.ratio    | p.value   |
|---------|----------|------------------|------------|-----------|----|------------|-----------|
| CCL5    | Donor    | 2551 - 2559      | 1.2374399  | 0.2299793 | 84 | 5.3806573  | 0.0000039 |
|         |          | 2551 - 2572      | 0.2850019  | 0.2273478 | 84 | 1.2535947  | 0.5948066 |
|         |          | 2551 - 438Z013.1 | 0.2433591  | 0.2299793 | 84 | 1.0581782  | 0.7157248 |
|         |          | 2559 - 2572      | -0.9524380 | 0.2299793 | 84 | -4.1414070 | 0.0004680 |
|         |          | 2559 - 438Z013.1 | -0.9940808 | 0.2324005 | 84 | -4.2774462 | 0.0002866 |
|         |          | 2572 - 438Z013.1 | -0.0416428 | 0.2299793 | 84 | -0.1810721 | 0.9978758 |
|         | Virus    | ANDV - HTNV      | 0.1927128  | 0.2327616 | 84 | 0.8279410  | 0.8410650 |
|         |          | ANDV - PHV       | 0.7528930  | 0.2273478 | 84 | 3.3116361  | 0.0073471 |
|         |          | ANDV - Mock      | 4.1692048  | 0.2273478 | 84 | 18.3384472 | 0.0000000 |
|         |          | HTNV - PHV       | 0.5601802  | 0.2327616 | 84 | 2.4066698  | 0.0835832 |
|         |          | HTNV - Mock      | 3.9764920  | 0.2327616 | 84 | 17.0839724 | 0.0000000 |
|         |          | PHV - Mock       | 3.4163118  | 0.2273478 | 84 | 15.0268111 | 0.0000000 |
| CXCL10  | Donor    | 2551 - 2559      | 0.8111938  | 0.1202064 | 85 | 6.7483394  | 0.0000000 |
|         |          | 2551 - 2572      | 0.5144713  | 0.1188326 | 85 | 4.3293783  | 0.0002346 |
|         |          | 2551 - 438Z013.1 | 0.0599084  | 0.1188326 | 85 | 0.5041409  | 0.9578866 |
|         |          | 2559 - 2572      | -0.2967225 | 0.1202064 | 85 | -2.4684413 | 0.0723132 |
|         |          | 2559 - 438Z013.1 | -0.7512854 | 0.1202064 | 85 | -6.2499603 | 0.0000001 |
|         |          | 2572 - 438Z013.1 | -0.4545629 | 0.1188326 | 85 | -3.8252374 | 0.0013966 |
|         | Virus    | ANDV - HTNV      | -0.0136826 | 0.1202064 | 85 | -0.1138257 | 0.9994683 |
|         |          | ANDV - PHV       | 0.2889101  | 0.1188326 | 85 | 2.4312365  | 0.0788864 |
|         |          | ANDV - Mock      | 5.7027006  | 0.1188326 | 85 | 47.9893616 | 0.0000000 |
|         |          | HTNV - PHV       | 0.3025927  | 0.1202064 | 85 | 2.5172757  | 0.0643842 |
|         |          | HTNV - Mock      | 5.7163831  | 0.1202064 | 85 | 47.5547194 | 0.0000000 |
|         |          | PHV - Mock       | 5.4137904  | 0.1188326 | 85 | 45.5581251 | 0.0000000 |
| CXCL11  | Donor    | 2551 - 2559      | 0.0822301  | 0.1421139 | 85 | 0.5786211  | 0.9382376 |
|         |          | 2551 - 2572      | 0.4803029  | 0.1404881 | 85 | 3.4188162  | 0.0052569 |
|         |          | 2551 - 438Z013.1 | 0.2089667  | 0.1405500 | 85 | 1.4867776  | 0.4499240 |
|         |          | 2559 - 2572      | 0.3980727  | 0.1421139 | 85 | 2.8010817  | 0.0314296 |
|         |          | 2559 - 438Z013.1 | 0.1267365  | 0.1422456 | 85 | 0.8909699  | 0.8095476 |
|         |          | 2572 - 438Z013.1 | -0.2713362 | 0.1405500 | 85 | -1.9305309 | 0.2231544 |
|         | Virus    | ANDV - HTNV      | 0.3783693  | 0.1421139 | 85 | 2.6624362  | 0.0450109 |
|         |          | ANDV - PHV       | 0.6967154  | 0.1404881 | 85 | 4.9592497  | 0.0000211 |
|         |          | ANDV - Mock      | 5.7037960  | 0.1405500 | 85 | 40.5819593 | 0.0000000 |
|         |          | HTNV - PHV       | 0.3183461  | 0.1421139 | 85 | 2.2400766  | 0.1208265 |
|         |          | HTNV - Mock      | 5.3254267  | 0.1422456 | 85 | 37.4382540 | 0.0000000 |
|         |          | PHV - Mock       | 5.0070806  | 0.1405500 | 85 | 35.6248964 | 0.0000000 |
| IDO     | Donor    | 2551 - 2559      | 0.1390608  | 0.1259221 | 85 | 1.1043399  | 0.6878590 |
|         |          | 2551 - 2572      | 0.8847638  | 0.1244830 | 85 | 7.1075083  | 0.0000000 |
|         |          | 2551 - 438Z013.1 | -0.2779103 | 0.1244830 | 85 | -2.2325168 | 0.1227918 |
|         |          | 2559 - 2572      | 0.7457030  | 0.1259221 | 85 | 5.9219371  | 0.0000004 |
|         |          | 2559 - 438Z013.1 | -0.4169712 | 0.1259221 | 85 | -3.3113414 | 0.0073253 |

|      |       |                  |            |           |    |            |           |
|------|-------|------------------|------------|-----------|----|------------|-----------|
| IFNB | Virus | 2572 - 438Z013.1 | -1.1626742 | 0.1244830 | 85 | -9.3400251 | 0.0000000 |
|      |       | ANDV - HTNV      | 0.5909158  | 0.1259221 | 85 | 4.6927078  | 0.0000597 |
|      |       | ANDV - PHV       | 0.1792515  | 0.1244830 | 85 | 1.4399681  | 0.4782614 |
|      |       | ANDV - Mock      | 2.5052117  | 0.1244830 | 85 | 20.1249333 | 0.0000000 |
|      |       | HTNV - PHV       | -0.4116643 | 0.1259221 | 85 | -3.2691970 | 0.0083243 |
|      |       | HTNV - Mock      | 1.9142959  | 0.1259221 | 85 | 15.2022187 | 0.0000000 |
|      |       | PHV - Mock       | 2.3259602  | 0.1244830 | 85 | 18.6849651 | 0.0000000 |
|      | Donor | 2551 - 2559      | 0.7816387  | 0.1118701 | 82 | 6.9870201  | 0.0000000 |
|      |       | 2551 - 2572      | 1.0238043  | 0.1116604 | 82 | 9.1689119  | 0.0000000 |
|      |       | 2551 - 438Z013.1 | 0.6762051  | 0.1116604 | 82 | 6.0559087  | 0.0000002 |
|      |       | 2559 - 2572      | 0.2421656  | 0.1118701 | 82 | 2.1647033  | 0.1418584 |
|      |       | 2559 - 438Z013.1 | -0.1054336 | 0.1118701 | 82 | -0.9424642 | 0.7820806 |
|      |       | 2572 - 438Z013.1 | -0.3475992 | 0.1116604 | 82 | -3.1130033 | 0.0133414 |
|      |       | ANDV - HTNV      | 0.4498727  | 0.1105737 | 82 | 4.0685327  | 0.0006165 |
|      | Virus | ANDV - PHV       | 0.5375969  | 0.1093094 | 82 | 4.9181227  | 0.0000260 |
|      |       | ANDV - Mock      | 2.6640437  | 0.1136565 | 82 | 23.4394332 | 0.0000000 |
|      |       | HTNV - PHV       | 0.0877242  | 0.1105737 | 82 | 0.7933551  | 0.8572676 |
|      |       | HTNV - Mock      | 2.2141710  | 0.1149711 | 82 | 19.2585085 | 0.0000000 |
|      |       | PHV - Mock       | 2.1264468  | 0.1136565 | 82 | 18.7094179 | 0.0000000 |

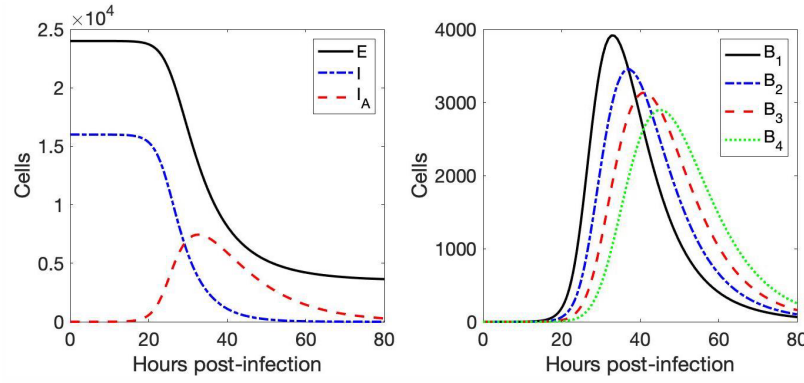

**Figure S1. Graphs of the seven cell stages over time in the HLMVEC target-cell limited model (1).**

### Dynamics of model (1):

Based on the experimental results, the initial conditions are fixed at  $E(0)=24,000$  cells and  $I(0)=16,000$  cells with other initial values in model (1) set to zero. It follows from the theory of differential equations that each of the seven variables in model (1) are nonnegative and bounded [1]. The uninfected endothelial cells  $E$  decrease over time as they transition to bystander cells  $B_1$ . The activated infected cells  $I_A$  eventually stop signaling over time  $I_A \rightarrow 0$  because the transition rate  $f(t) \rightarrow 0$  and signaling decreases over time. Also, bystander cells  $B_1$  through  $B_4$  initially increase, then decrease to zero over time. The solution for each of the cell stages in the target-cell limited model (1) are graphed in the Figure S1

### Reference

1. Brauer, F. and J.A. Nohel, *The Qualitative Theory Of Ordinary Differential Equations; An Introduction*. University mathematics series. 1969, New York; W. A. Benjamin. xi, 314 p.



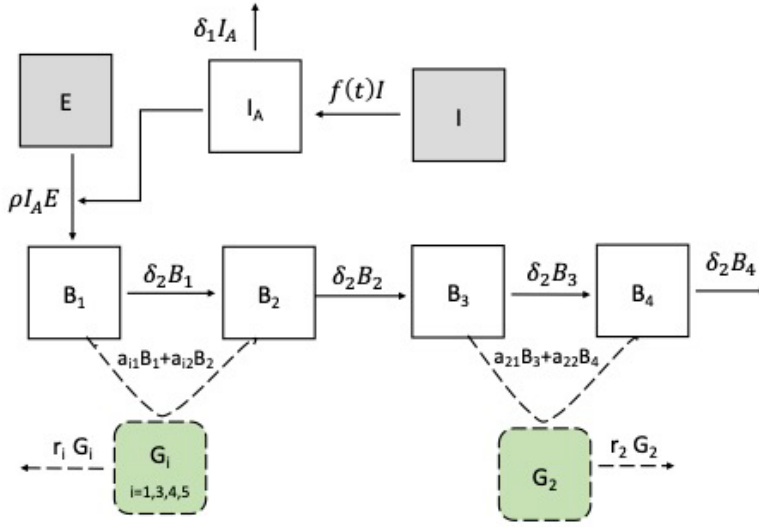

**Figure S2. Compartmental diagram of models (1) and (3).**

#### Compartmental diagram and discussion of models (1) and (3):

The dynamics of models (1) and (3) are illustrated in the compartmental diagram in Figure S2. The transition rates between the cell stages (compartments) in model (1) are denoted by arrows which show the direction of the rate of change between uninfected endothelial cells and bystander cells,  $E, B_1, B_2, B_3, B_4$ , and between infected and actively infected endothelial cells,  $I$  and  $I_A$ . Models (1) and (3) begin at time 0 with a portion of the 40,000 cells infected,  $I(0)=16,000$ , and the remaining cells uninfected,  $E(0)=24,000$  (gray compartments). After a delay of approximately 24 hours, the infected endothelial cells are activated  $I_A$  at rate  $f(t)I$  and begin signaling neighboring uninfected endothelial cells  $E$  (rate  $\rho I_A E$ ) to bystander activation when gene expression levels of the chemokines and cytokines are upregulated,  $G_i$  through  $G_5$  (green compartments). The dashed curves indicate the rate of fold change of the intracellular gene expression levels within the bystander cells ( $a_{11}B_1+a_{12}B_2$ ,  $i=1,3,4,5$ ;  $a_{21}B_3+a_{22}B_4$ ,  $i=2$ ) and the rate of decrease in fold change ( $r_i G_i$ ). To account for the time that gene expression levels reach their peak values within the bystander cells, the bystander cells are divided into four stages,  $B_1$  to  $B_4$ , where  $B_1$  represents the time of the earliest activation and  $B_4$  the latest. Each stage has an average duration of four hours. The models follow the dynamics of the HLMVECs and gene expression levels from time 0 to 72 hours post-infection.

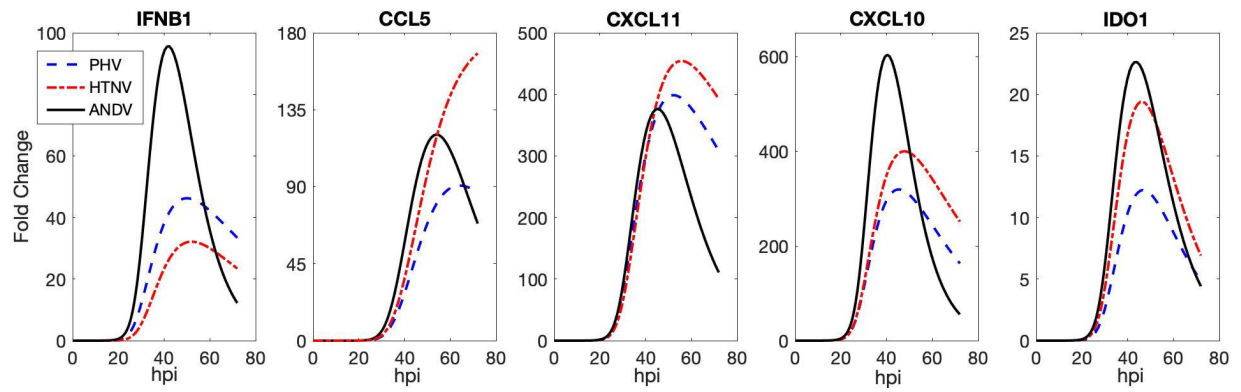

**Figure S3. Comparison of PHV, HTNV, and ANDV infection on specific cytokine or chemokine upregulation.** Fold change curves were fit to model (3) for IFNB1, CCL5, CXCL11, CXCL10 and IDO1 for the three viruses, PHV, HTNV, and ANDV. Fitted curves show continuous fold change over time.
